# Supplementary material
Source: publisher site journal article supplement (http://www.spandidos-publications.com/2260/downloadSupplementary)
Supplement: Supplementary file 1 [file downloadSupplementary]

Table SI. Clinicopathological features of male study participants.

| Variable               | Non-obese (BMI <85th) | Obese (BMI >95th)       |
|------------------------|-----------------------|-------------------------|
| Number                 | 26                    | 14                      |
| Age, year              | 8.19±0.28             | 8.08±0.44               |
| BMI, kg/m <sup>2</sup> | 16.40±0.39            | 22.37±0.74 <sup>a</sup> |

Data are presented as the mean ± SEM. <sup>a</sup>P<0.01. BMI, body mass index.
